# Supplementary material
Source: PubMed Central journal article supplement (PMC3031387)
Supplement: blood-2010-05-283937_1.pdf [file blood-2010-05-283937_1.pdf]

## **Supplemental Materials**

# **Lyn- and PLC- $\beta$ 3-dependent regulation of SHP-1 phosphorylation controls Stat5 activity and myelomonocytic leukemia-like disease**

**Wenbin Xiao, \* Tomoaki Ando,\* Huan-You Wang, † Yuko Kawakami, \*  
and Toshiaki Kawakami<sup>2, \*</sup>**

### List of Supplemental Items

1. Supplemental Methods
2. Supplemental Tables S1-S3
3. Supplemental Figures S1-S8

## **Histology and immunofluorescence**

Tissues were fixed in 10% formalin, embedded in paraffin, sectioned at 6  $\mu$ m, and stained with hematoxylin and eosin (H&E). Blood smears were stained in Wright-Giemsa. For immunofluorescence, tissues were fixed in 4% paraformaldehyde, embedded in O.C.T. Compound (Sakura Finetek). Frozen sections were permeabilized by ice-cold methanol, stained with rat anti-F4/80 (Abcam) and rabbit anti-Ym-1 (StemCell Technologies) antibodies, followed by anti-Rat (Texas red) (Southern Biotech) and anti-rabbit (Alexa Fluor 488) (Invitrogen) as second antibodies. Coverslips were mounted with ProLong Gold antifade reagent with DAPI (Invitrogen). Fluorescence was observed using a Marianas microscope system (Intelligent Imaging Innovations).

## **Identification, purification, and proliferation of HSC and progenitors**

Cell sorting was performed by immunomagnetic-based pre-enrichment followed by flow cytometric sorting. Briefly, lineage (Lin)<sup>+</sup> cells were depleted from BM cells using a lineage depletion Kit (StemCell Technologies), which contained biotin-conjugated antibodies for B220, Gr-1, CD11b, CD8, CD4, and Ter119. Lin<sup>-lo</sup> cells were incubated with PerCP-Cy5.5-conjugated streptavidin (eBioscience) and subsequently stained with rat anti-mouse Sca-1 (FITC), rat anti-mouse c-Kit (APC), and rat anti-mouse IL-7R (PE) (from PharMingen or eBioscience). Cells were also stained with 7-aminoactinomycin D to exclude dead cells. To detect LT-HSC, Lin<sup>-lo</sup> cells were stained with rat anti-mouse CD34 (PE), rat anti-mouse Sca-1 (FITC), and rat anti-mouse c-Kit (APC). To identify the CMP, GMP, and MEP, the same Lin staining was performed together with rat anti-mouse c-Kit (APC), rat anti-mouse CD34 (FITC), and rat anti-mouse Fc $\gamma$ R (PE) (PharMingen), and anti-Sca-1-biotin and anti-IL-7R $\alpha$ -biotin antibodies (visualized by streptavidin-TriColor). The phenotype of LT-HSC and ST-HSC was defined as Lin<sup>-</sup>IL-7R $\alpha$ <sup>-</sup>Sca-1<sup>hi</sup>c-Kit<sup>hi</sup>CD34<sup>-</sup> and Lin<sup>-</sup>IL-7R $\alpha$ <sup>-</sup>Sca-1<sup>hi</sup>c-Kit<sup>hi</sup>CD34<sup>+</sup>, respectively; CMP as Lin<sup>-</sup>IL-7R<sup>-</sup>Sca-1<sup>-</sup>CD34<sup>+</sup>Fc $\gamma$ R<sup>lo</sup>; GMP as Lin<sup>-</sup>IL-7R<sup>-</sup>Sca-1<sup>-</sup>CD34<sup>+</sup>Fc $\gamma$ R<sup>hi</sup>; MEP as Lin<sup>-</sup>IL-7R<sup>-</sup>Sca-1<sup>-</sup>CD34<sup>-</sup>Fc $\gamma$ R<sup>lo</sup>. SLAM markers were also used to identify HSCs by staining BM cells with biotin-conjugated Lineage cocktails revealed by PerCP-Cy5.5 conjugated streptavidin, anti-mouse c-Kit (APC), anti-mouse CD150 (PE, clone mShad150, eBioscience) and anti-mouse CD48 (FITC, clone HM48-1, eBioscience). Lin<sup>-</sup>c-Kit<sup>+</sup>CD150<sup>+</sup>CD48<sup>-</sup> population was enriched for HSCs. All cell populations were sorted or analyzed using a FACSVantage Diva or FACS Aria (Becton Dickinson). The purity of all sorted HSC/progenitor populations was >98%. For proliferation assays, CD34<sup>-</sup> KSL

cells were sorted into a 96-well round bottom plate (50 cells per well) in 200  $\mu$ l of IMDM containing 5% FBS, 50  $\mu$ M 2-mercaptoethanol, and IL-3 (100 ng/ml) and SCF (100 ng/ml), and incubated at 37°C for the indicated periods.

### **Cell cycle analysis**

For propidium iodide staining analysis, sorted KSL cells were incubated for 24 h in IMDM supplemented (or not) with IL-3 (100 ng/ml). Then cells were centrifuged and resuspended in a hypotonic buffer (0.1% sodium citrate, 0.1% Triton X-100) containing RNase and propidium iodide. Samples were analyzed within 1 h. For G<sub>0</sub>/G<sub>1</sub> analysis, sorted KSL cells were incubated for 1 h at 37°C in Hank's balanced salt solution with 20 mM HEPES, 1 g/l glucose, 10% FCS, and 1.7  $\mu$ M Hoechst 33342 (Invitrogen). After washing, the cells were incubated in the same buffer containing Pyronin Y (1  $\mu$ g/ml; Sigma-Aldrich) for another hour at 37°C. Finally, cells were analyzed using an LSRII (Becton Dickinson) and a FlowJo software.

### **Transplantation of retrovirally transduced HSCs**

CD34<sup>+</sup>KSL cells were FACS-sorted into Retronectin-precoated wells (150 cells per well). These cells were infected with a concentrated high-titer virus (at the multiplicity of infection of 600) in the presence of IL-6 (100 ng/ml), FLT3L (20 ng/ml), and SCF (100 ng/ml). 3 days later, these cells (estimated 2000-5000 cells in total) were transplanted into lethally irradiated recipients together with 10<sup>7</sup> Sca-1-depleted BM helper cells. The protocols for this and other experiments will be provided upon request.

**Table S1. Complete blood cell counts in 2 month-old mice**

|                                     | Wt<br>(n=6) | lyn <sup>-/-</sup><br>(n=8) | PLC-β3 <sup>-/-</sup><br>(n=8) | Dko<br>(n=8)  | me <sup>v</sup> ‡<br>(n=4) |
|-------------------------------------|-------------|-----------------------------|--------------------------------|---------------|----------------------------|
| Total WBC<br>(x10 <sup>3</sup> /μl) | 11.23±2.75  | 6.22±1.76*                  | 9.68±1.90                      | 6.33±1.47*    | 5.85±0.63*                 |
| Neutrophil                          | 2.44±0.71   | 2.62±1.03                   | 2.85±0.88                      | 2.97±0.66     | 3.43±0.86                  |
| Lymphocyte                          | 7.82±1.85   | 3.15±0.54**                 | 6.31±1.01                      | 2.84±0.71**   | 1.84±0.21**                |
| Monocyte                            | 0.46±0.15   | 0.41±0.16                   | 0.47±0.15                      | 0.38±0.25     | 0.52±0.11                  |
| Eosinophil                          | 0.35±0.34   | 0.04±0.05                   | 0.05±0.03                      | 0.09±0.14     | 0.06±0.03                  |
| basophil                            | 0.16±0.19   | 0.01±0.01                   | 0.01±0.01                      | 0.04±0.07     | 0.01±0.01                  |
| Hemoglobin<br>(g/dl)                | 13.35±1.18  | 13.93±0.52                  | 12.83±0.15                     | 13.20±0.27    | 13.23±0.65                 |
| Platelet (x10 <sup>3</sup> /μl)     | 964±100     | 934±30.64                   | 992±99.94                      | 1009±192      | 928±200                    |
| Differential<br>count (%)           |             |                             |                                |               |                            |
| Neutrophil                          | 21.71±3.38  | 41.04±4.68***               | 28.98±4.37*                    | 47.38±6.59*** | 58.04±8.71***              |
| Lymphocyte                          | 69.86±3.42  | 51.86±5.88**                | 65.77±5.21                     | 44.84±4.46**  | 31.82±6.77**               |
| Monocyte                            | 4.11±1.10   | 6.51±0.60                   | 4.80±0.75                      | 5.74±2.29     | 9.07±2.77*                 |
| Eosinophil                          | 2.96±2.57   | 0.51±0.63                   | 0.43±0.23                      | 1.40±2.17     | 0.96±0.41                  |
| basophil                            | 1.36±1.49   | 0.09±0.12                   | 0.03±0.02                      | 0.63±1.10     | 0.11±0.02                  |

‡ 6 weeks old

\* p&lt;0.05 vs wt, \*\* p&lt;0.01 vs wt, \*\*\* p&lt;0.001 vs wt

**Table S2. Complete blood cell counts in 6 month-old mice**

|                                     | Wt<br>(n=6) | lyn <sup>-/-</sup><br>(n=8) | PLC-β3 <sup>-/-</sup><br>(n=8) | Dko<br>(n=8)   |
|-------------------------------------|-------------|-----------------------------|--------------------------------|----------------|
| Total WBC<br>(x10 <sup>3</sup> /μl) | 8.45±1.44   | 6.07±1.23                   | 15.10±3.80**                   | 9.28±2.8       |
| Neutrophil                          | 1.88±0.25   | 2.41±1.60                   | 3.81±1.48*                     | 4.72±2.05**    |
| Lymphocyte                          | 6.30±1.59   | 3.05±1.56*                  | 10.74±2.07**                   | 3.74±1.61      |
| Monocyte                            | 0.25±0.11   | 0.40±0.24                   | 0.45±0.21                      | 0.72±0.63*     |
| Eosinophil                          | 0.02±0.02   | 0.15±0.21                   | 0.09±0.10                      | 0.17±0.18      |
| basophil                            | 0.01±0.01   | 0.05±0.09                   | 0.01±0.01                      | 0.03±0.03      |
| Hemoglobin<br>(g/dl)                | 12.85±1.20  | 12.13±0.28                  | 13.13±0.71                     | 9.59±1.0***    |
| Platelet (x10 <sup>3</sup> /μl)     | 1100±141    | 1078±228                    | 1334±190                       | 549±139***     |
| Differential count<br>(%)           |             |                             |                                |                |
| Neutrophil                          | 22.79±4.77  | 38.69±7.74                  | 24.56±4.09                     | 52.73±11.12*** |
| Lymphocyte                          | 73.92±6.28  | 52.25±9.32                  | 72.02±4.78                     | 38.07±12.83*** |
| Monocyte                            | 3.09±1.67   | 6.30±2.28                   | 2.89±0.65                      | 7.40±2.77*     |
| Eosinophil                          | 0.16±0.22   | 2.02±2.55                   | 0.50±0.50                      | 1.58±0.73**    |
| basophil                            | 0.04±0.04   | 0.75±1.03                   | 0.03±0.05                      | 0.22±0.13*     |

\* p<0.05 vs wt, \*\* p<0.01 vs wt, \*\*\* p<0.001 vs wt

**Table S3. Complete blood cell counts at 5 months after BM transplantation**

|                                     | Wt (n=6)   | Dko (n=8)     |
|-------------------------------------|------------|---------------|
| Total WBC<br>(x10 <sup>3</sup> /μl) | 12.24±1.91 | 6.12±1.30**   |
| Neutrophil                          | 2.13±0.56  | 2.84±0.23*    |
| Lymphocyte                          | 9.60±1.51  | 2.60±1.14***  |
| Monocyte                            | 0.31±0.11  | 0.44±0.19     |
| Eosinophil                          | 0.14±0.09  | 0.17±0.11     |
| basophil                            | 0.07±0.06  | 0.07±0.05     |
| Hemoglobin<br>(g/dl)                | 13.03±0.58 | 9.95±0.76*    |
| Platelet (x10 <sup>3</sup> /μl)     | 786±150    | 469±184*      |
| Differential count<br>(%)           |            |               |
| Neutrophil                          | 17.41±3.71 | 42.20±3.67*** |
| Lymphocyte                          | 78.54±4.15 | 46.01±5.69*** |
| Monocyte                            | 2.46±0.55  | 8.06±1.71***  |
| Eosinophil                          | 1.09±0.69  | 2.67±1.64     |
| basophil                            | 0.51±0.47  | 1.07±0.95     |

\* p<0.05 vs wt, \*\* p<0.01 vs wt, \*\*\* p<0.001 vs wt

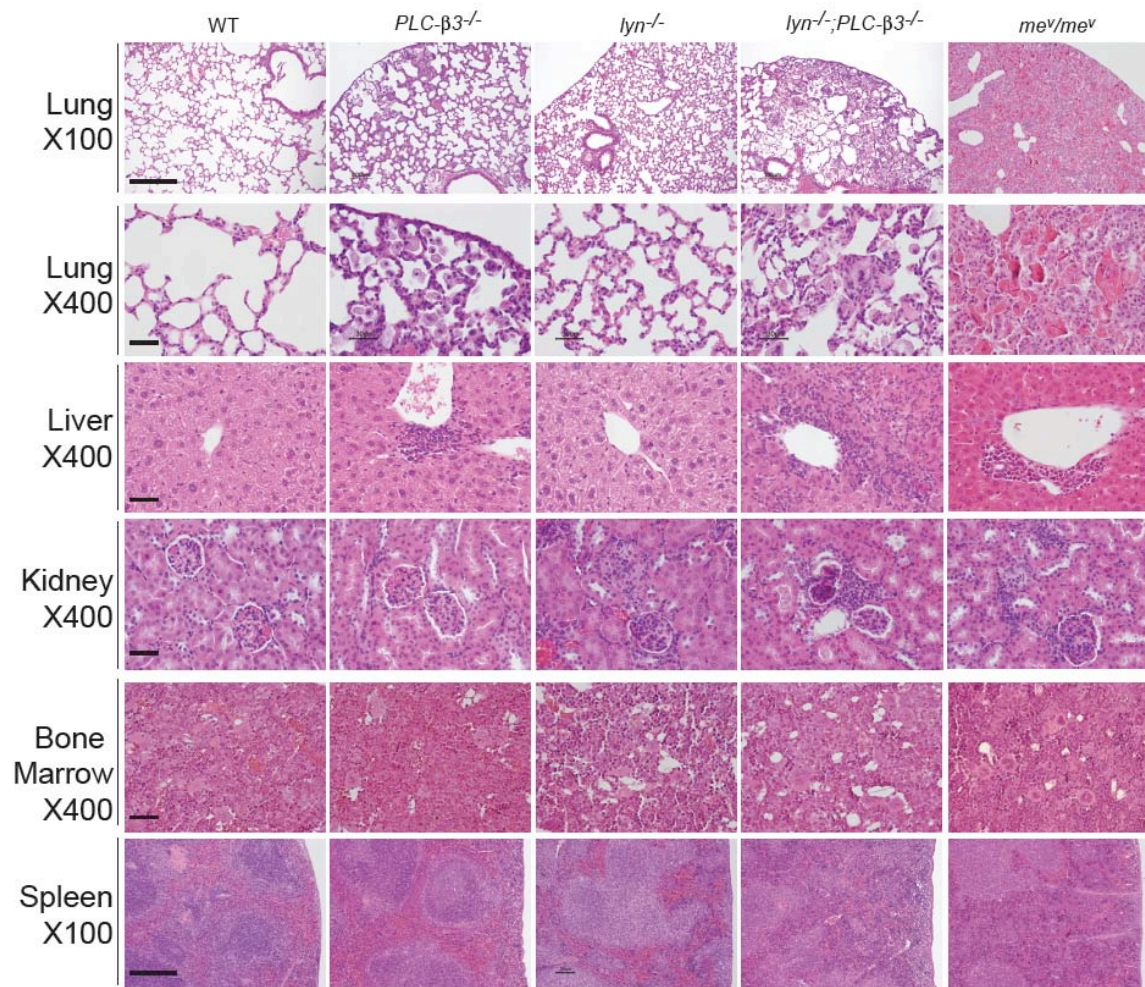

**Figure S1.** H&E-stained organs of *lyn*<sup>-/-</sup>;*PLC-β3*<sup>-/-</sup> mice in comparison to wt, *PLC-β3*<sup>-/-</sup>, *lyn*<sup>-/-</sup> and *me*<sup>v</sup>/*me*<sup>v</sup> mice. Bars indicate 200 μm for X100 magnification images and 30 μm for X400 magnification images.

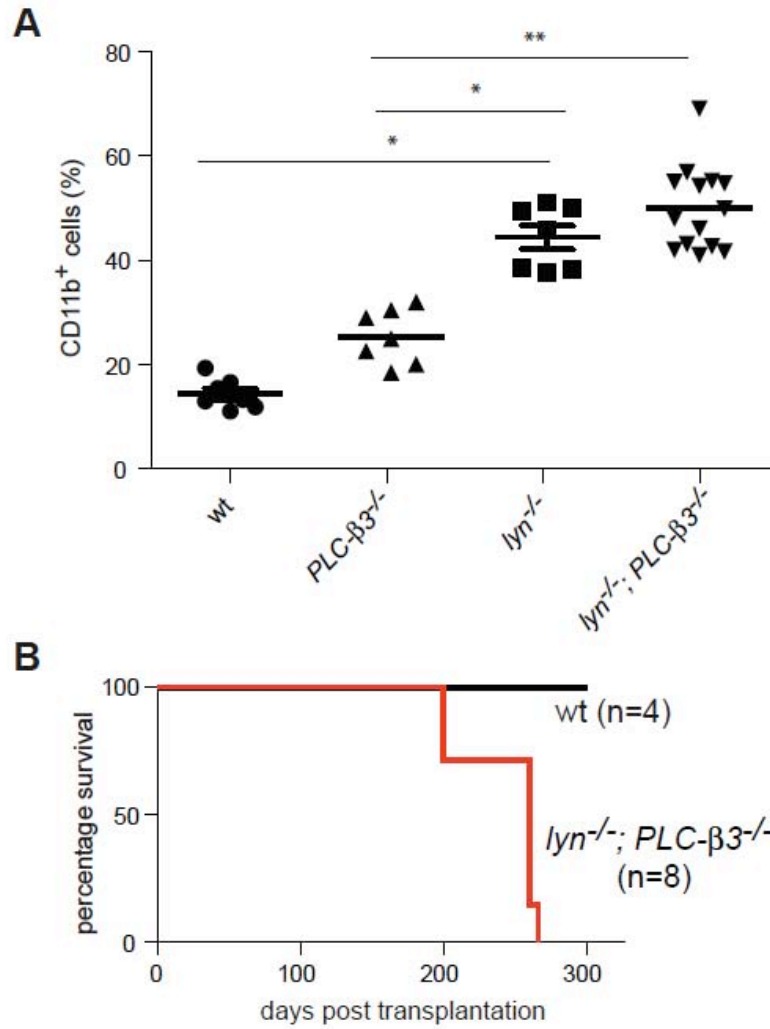

**Figure S2. MDS/MPN in *lyn<sup>-/-</sup>; PLC-β3<sup>-/-</sup>* mice can be transferred with BM cells.** BM cells from the indicated mice (CD45.2<sup>+</sup>) were adoptively transferred to lethally irradiated CD45.1<sup>+</sup> congenic B6 mice. (A) Four months after transplantation, peripheral blood leukocytes were analyzed by flow cytometry to measure CD11b<sup>+</sup> cells among CD45.2<sup>+</sup> cells. (B) Survival curves for mice that received BM cells of the indicated genotypes.



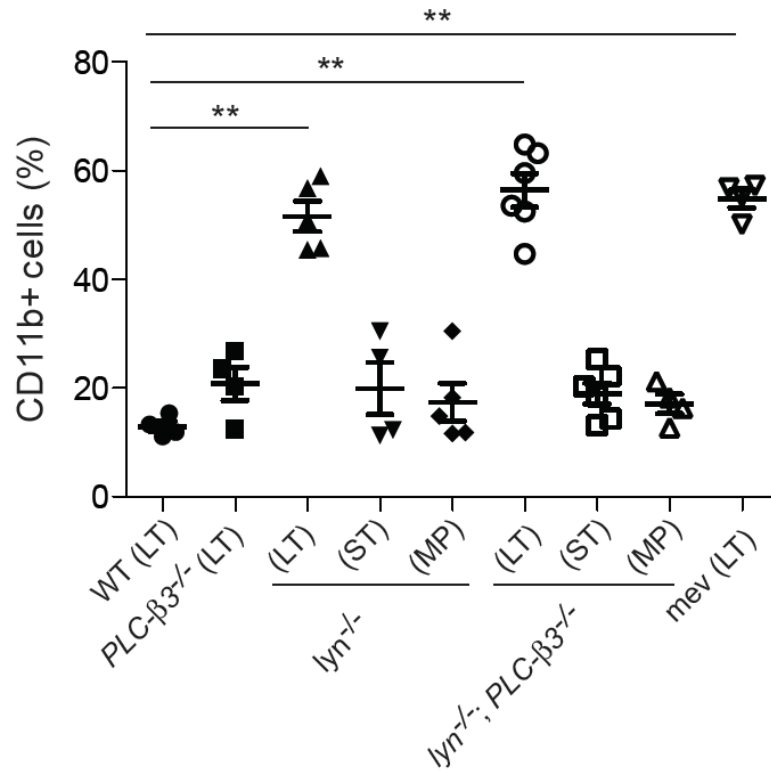

**Figure S3. The MDS/MPN in *lyn*<sup>-/-</sup>;*PLC-β3*<sup>-/-</sup> mice originates from an LT-HSC population.**

FACS-sorted cells were adoptively transferred to lethally irradiated CD45.1<sup>+</sup> mice. Four months after transplantation, peripheral blood leukocytes were analyzed by flow cytometry to measure CD11b<sup>+</sup> cells among CD45.2<sup>+</sup> cells. LT, LT-HSCs represented by CD34<sup>+</sup>KSL cells; ST, ST-HSCs represented by CD34<sup>+</sup>KSL cells; MP, myeloid progenitors represented by Lin<sup>-</sup>c-Kit<sup>+</sup>Sca-1<sup>-</sup> cells.

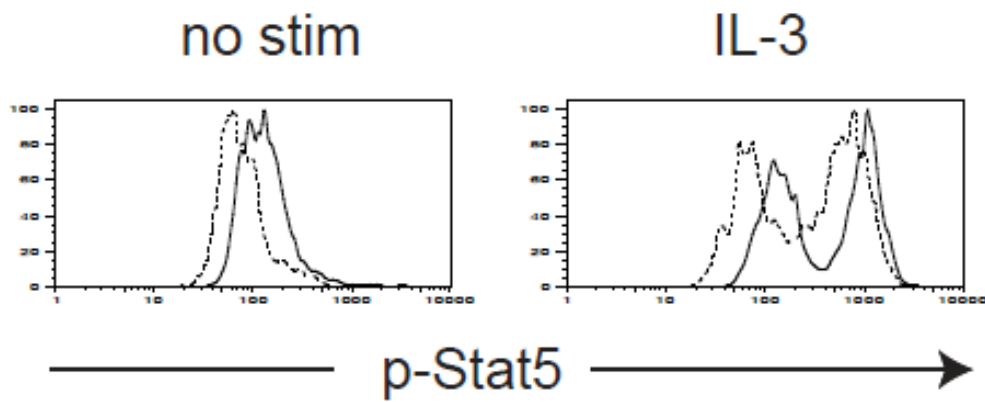

**Figure S4. HSCs/progenitors have constitutive Stat5 phosphorylation in *lyn*<sup>-/-</sup>;*PLC-β3*<sup>-/-</sup> mice.**

Stat5 phosphorylation at Tyr<sup>694</sup> in non-stimulated or IL-3 stimulated KSL cells was analyzed by flow cytometry. Dashed line, wt; solid line, *lyn*<sup>-/-</sup>;*PLC-β3*<sup>-/-</sup>

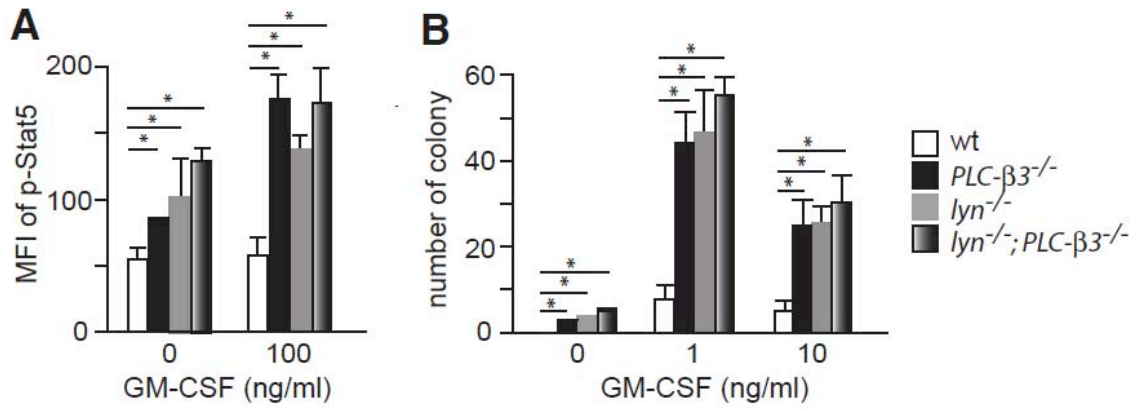

**Figure S5. Increase Stat5 phosphorylation and colony-forming activity in *lyn<sup>-/-</sup>*, *PLC-β3<sup>-/-</sup>*, and *lyn<sup>-/-</sup>;PLC-β3<sup>-/-</sup>* HSC/progenitors in response to GM-CSF.**

(A) BM cells were stimulated with GM-CSF, and phospho-Stat5 levels were analyzed by flow cytometry. Mean fluorescence intensity (MFI) of Stat5 phosphorylation in KSL cells is presented (n=6). (B) Sorted KSL cells were cultured in methylcellulose in the indicated concentrations of GM-CSF. 10 days later, the number of colonies (including CFU-G, CFU-M and CFU-GM) was counted.

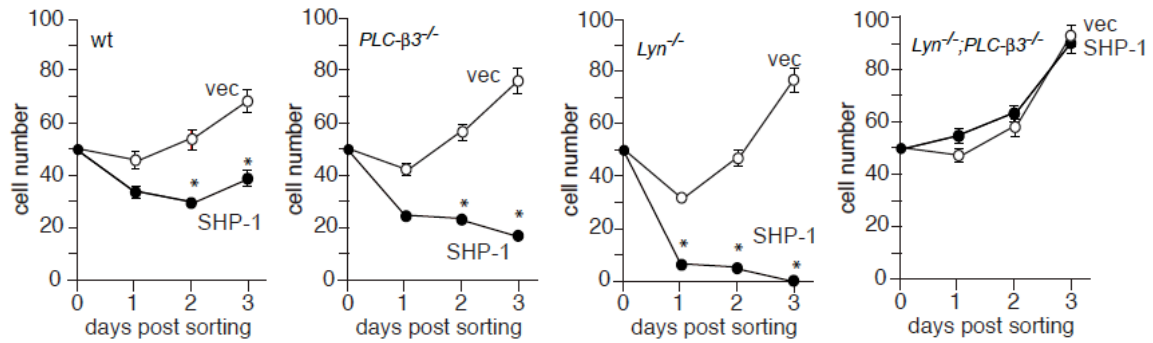

**Figure S6. Transduction with wt SHP-1 suppressed in vitro growth of CD34<sup>+</sup>KSL cells derived from wt, *PLC-β3*<sup>-/-</sup> and *lyn*<sup>-/-</sup> mice, but not *lyn*<sup>-/-</sup>;*PLC-β3*<sup>-/-</sup> mice.**

FACS sorted CD34-KSL cells were retrovirally transduced with wt SHP-1. The transduced cells were cultured in IL-3 and SCF.

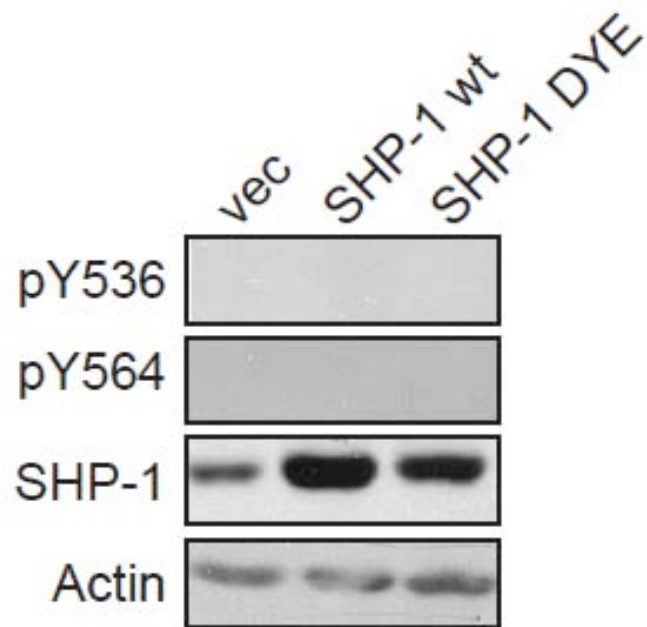

**Figure S7.** Transduced wt SHP-1 is not phosphorylated at Tyr<sup>536</sup> or Tyr<sup>564</sup> in *lyn*<sup>-/-</sup>; *PLC-β3*<sup>-/-</sup> BMMCs. *Lyn*<sup>-/-</sup>; *PLC-β3*<sup>-/-</sup> CD34-KSL cells were retrovirally transduced with the indicated SHP-1 constructs and cultured in IL-3 and SCF. The resulting BMMCs were analyzed by immunoblotting.

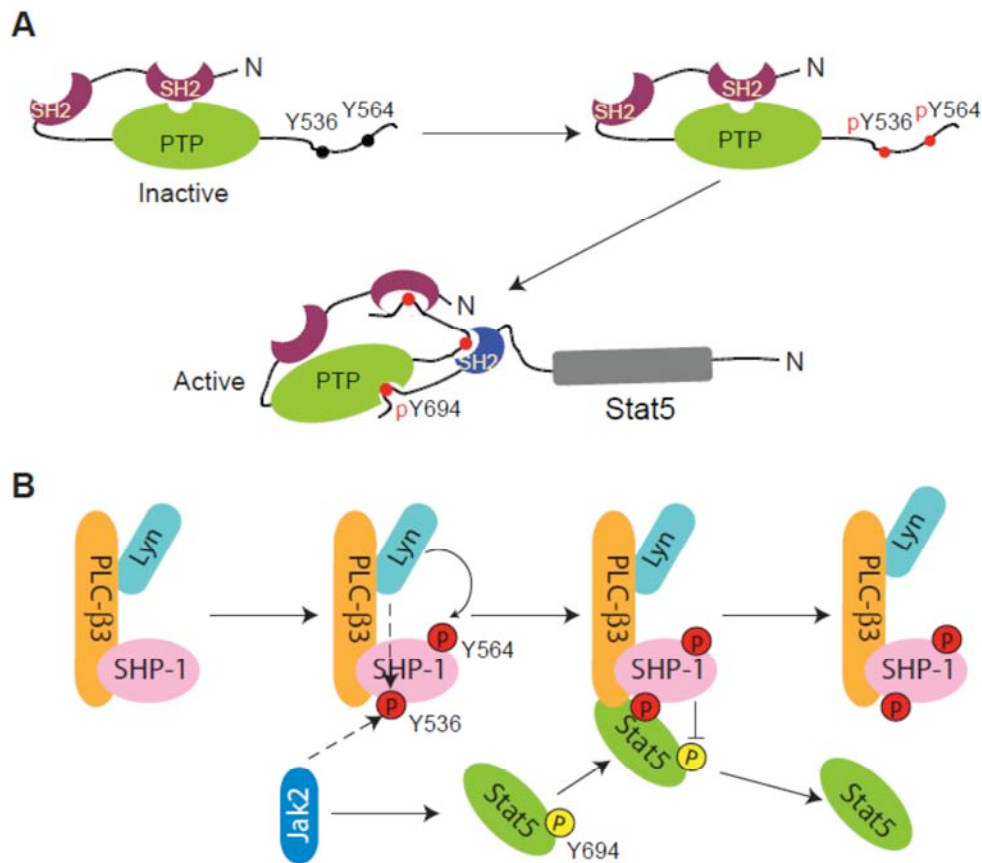

**Figure S8.** A model for SHP-1 activation and recognition of its substrate Stat5 based on accumulated studies (reviewed by Poole and Jones, *Cell. Signalling* 17:1323, 2005) and our current data. (A) SHP-1 is phosphorylated at Tyr<sup>564</sup> predominantly by Lyn and at Tyr<sup>536</sup> by Lyn and other kinase(s) including Jak2. Inactive SHP-1 (Top left) has a closed conformation with the catalytic site of the PTP domain capped by the N-SH2 domain (Yang, et al., *J Biol. Chem.* 278:6516, 2003). The Tyr<sup>536</sup> phosphorylation site of SHP-1 interacts with Stat5 most probably via the SH2 domain of the latter molecule (Bottom) (this study). The Tyr<sup>564</sup> phosphorylation site of SHP-1 interacts with N-SH2 to render the enzyme active. N-terminal ends of SHP-1 and Stat5 proteins are shown by 'N'. (B) SHP-1 and Lyn interact with the C-terminal domain of PLC-β3 (this study and Xiao et al., *Cancer Cell* 16:161, 2009). Tyr<sup>694</sup> phosphorylated Stat5 is recruited to the PLC-β3-nucleated complex containing Lyn and SHP-1, and dephosphorylated by an active SHP-1 enzyme that is phosphorylated at Tyr<sup>536</sup> and Tyr<sup>564</sup>. Stat5 dimer is depicted as a monomer for simplicity.
